# Supplementary material for: India-Asia collision was at 24°N and 50 Ma: palaeomagnetic proof from southernmost Asia
Source: PubMed Central journal article supplement — Sci Rep. 2012 Dec 5;2:925. doi: 10.1038/srep00925 (PMC3514643; doi:10.1038/srep00925), 2012-12-05
Supplement: srep00925-s1.pdf [file srep00925-s1.pdf]

1 **SUPPLEMENTARY INFORMATION**

2 **India-Asia collision was at 24°N and 50 Ma: palaeomagnetic proof**  
3 **from southernmost Asia**

4 Jun Meng<sup>1</sup> Chengshan Wang<sup>1\*</sup> Xixi Zhao<sup>2</sup> Rob Coe<sup>2</sup> Yalin Li<sup>1</sup> David Finn<sup>2</sup>

5 1 State Key Laboratory of Biogeology and Environmental Geology (China  
6 University of Geosciences), Beijing 100083, China

7 2 Department of Earth and Planetary Sciences, University of California, Santa Cruz,  
8 CA 95064, USA

9

10 \*Corresponding author: [chshwang@cugb.edu.cn](mailto:chshwang@cugb.edu.cn)

11 First author: [mj.chen2009@gmail.com](mailto:mj.chen2009@gmail.com)

12

13

14

15

16

17

18

19 **Supplementary Figures**

20

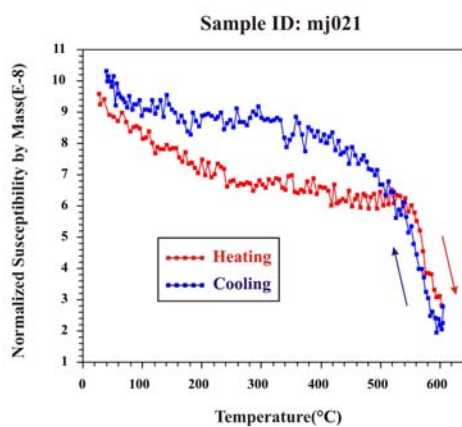

**a**

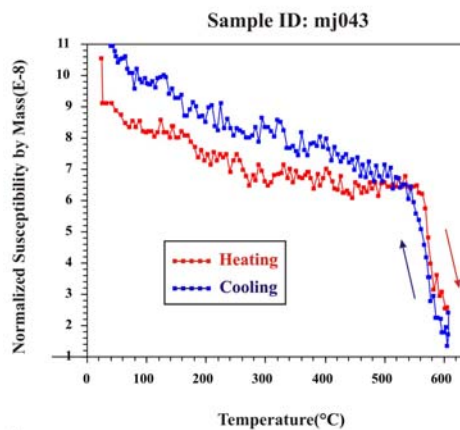

**b**

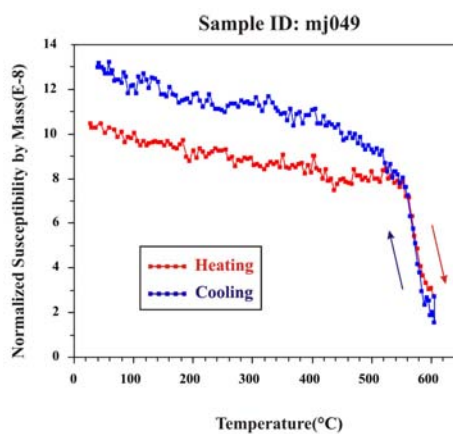

**c**

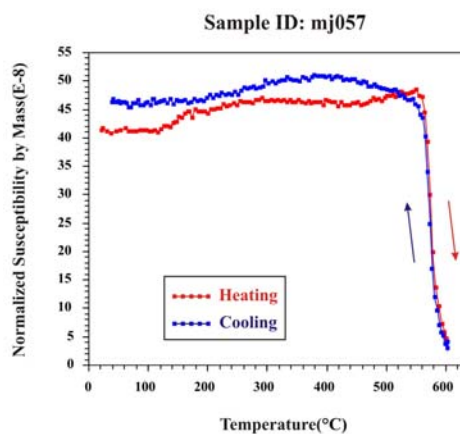

**d**

21

22 **Fig. S1** Normalized susceptibility by mass vs. temperature. All samples

23 heated in an argon environment.

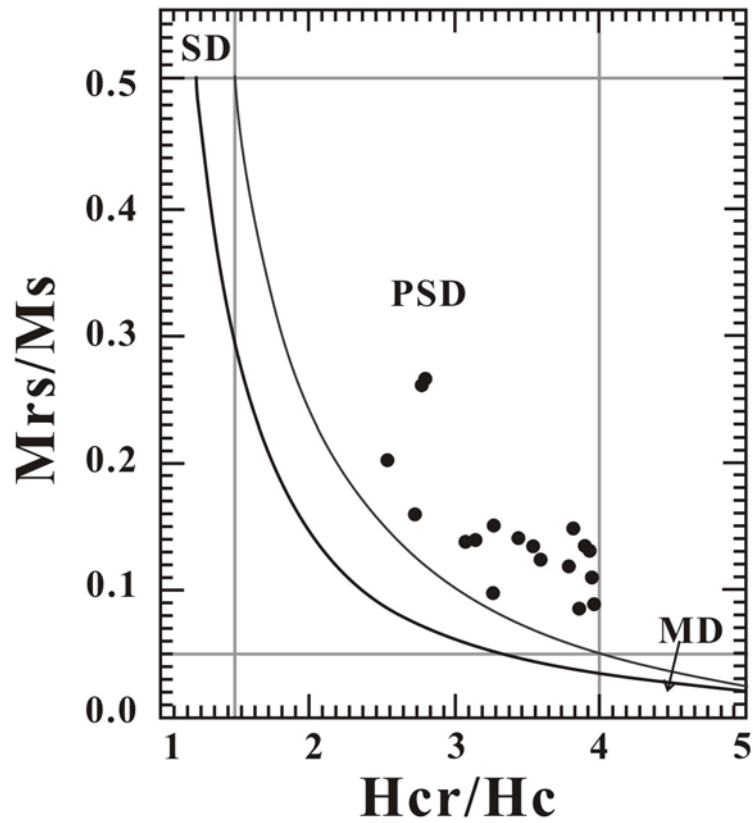

24

25 **Fig. S2** Day plot<sup>1</sup> of hysteresis data, showing the magnetic grain size of  
 26 samples. The straight grey lines mean magnetic grain size fields:  
 27 single-domain (SD), pseudo-single domain (PSD) and multidomain (MD).  
 28 Thick curved solid line is a theoretical mixing curve of MD and uniaxial  
 29 single-domain (SD) magnetite; thin curved line is a mixing curve of MD  
 30 and cubic SD magnetite<sup>2</sup>.

31

Palaeomagnetic demagnetization data-Grade C and D

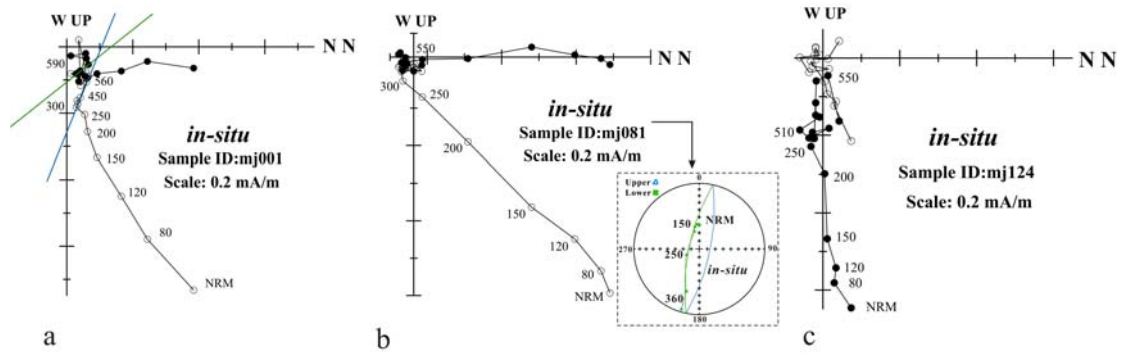

32

33 **Fig. S3** Representative orthogonal projections of grades C and D  
 34 palaeomagnetic demagnetization data from upper Cuojiangding Group  
 35 plotted in *in-situ* coordinate. Solid (open) circles are the horizontal  
 36 (vertical) plane projections. Scales are in mA/m. Green and blue straight  
 37 lines represent the least-square-best fitting directions of the ChRM. Green  
 38 and blue circle indicate the NRM directions distributed along with the  
 39 great circle in the equal-area projection. See text for description of  
 40 demagnetization behavior.

41

42

43

44

45

46

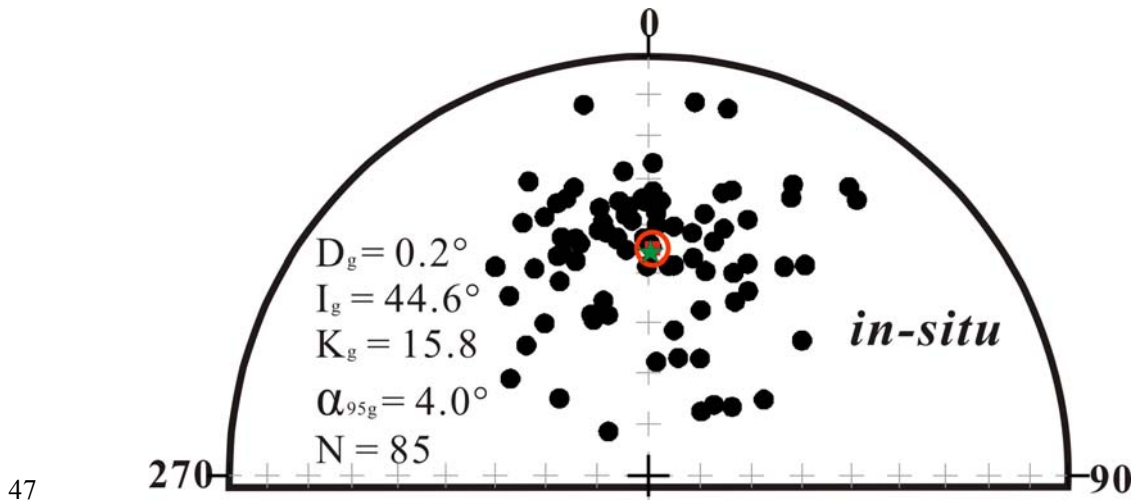

48 **Fig. S4** Equal-area projections of *in-situ* site mean direction for the low  
 49 temperature component (LTC) from upper Cuojiangding Group. Solid  
 50 black circles indicate lower hemisphere projections. Solid red square  
 51 stands for the site mean direction. Green star presents local geomagnetic  
 52 field.

53

54

55

56

57

58

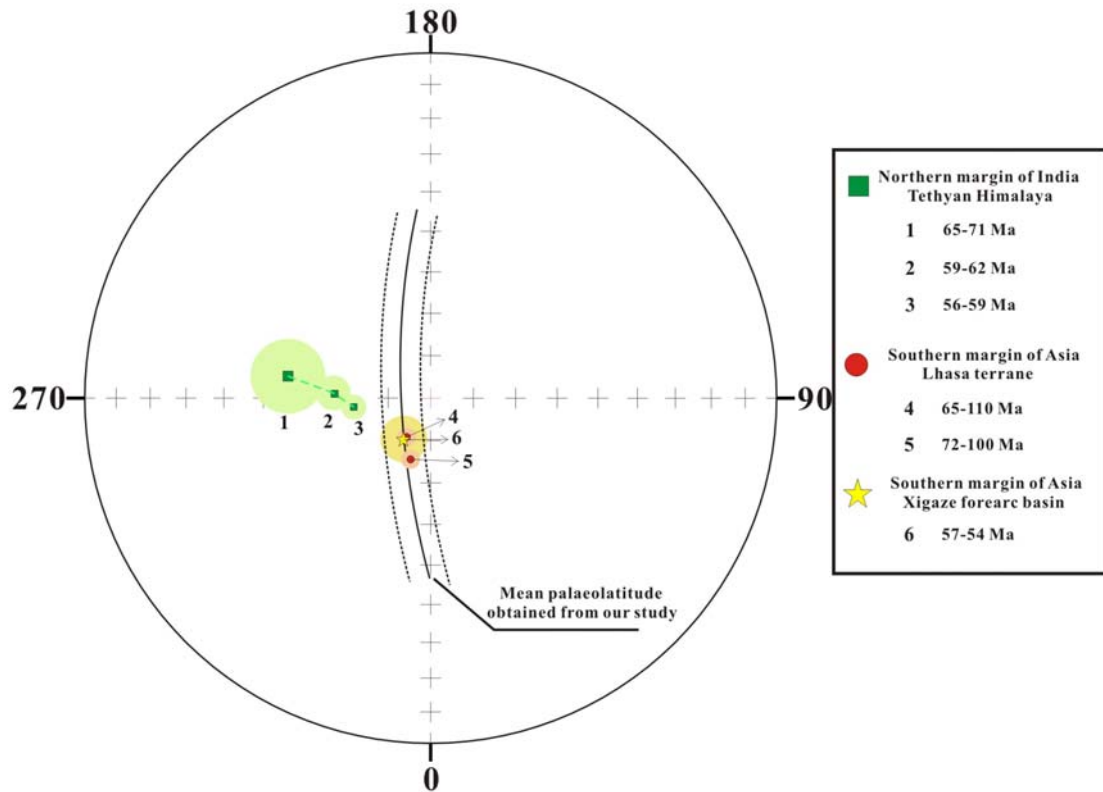

59

60 **Fig. S5** Equal-area projection showing palaeomagnetic poles of a  
 61 reference site comparison between northern margin of India and southern  
 62 margin of Asia. Numbers 1-6 correspond to palaeomagnetic poles  
 63 described by the authors as follows: 1, Patzelt *et al.* (1996)<sup>3</sup>; 2 and 3, Yi  
 64 *et al.* (2011)<sup>4</sup>; 4, Tan *et al.* (2010)<sup>5</sup>; 5, Sun *et al.* (2012)<sup>6</sup> and van  
 65 Hinsbergen *et al.* (2012)<sup>7</sup>; 6, This study. The black line stands for the  
 66 palaeolatitude obtained from the upper Cuojiangding Group. Confidence  
 67 limits which were calculated according Coe *et al.* (1985)<sup>8</sup> are illustrated  
 68 as black dashed lines. The data are plotted in the Northern Hemisphere.  
 69 All the selected results from Asia are indistinguishable within the error,  
 70 indicating a constant palaeolatitude for the southern margin of Asia from  
 71 the Cretaceous to Palaeogene time.

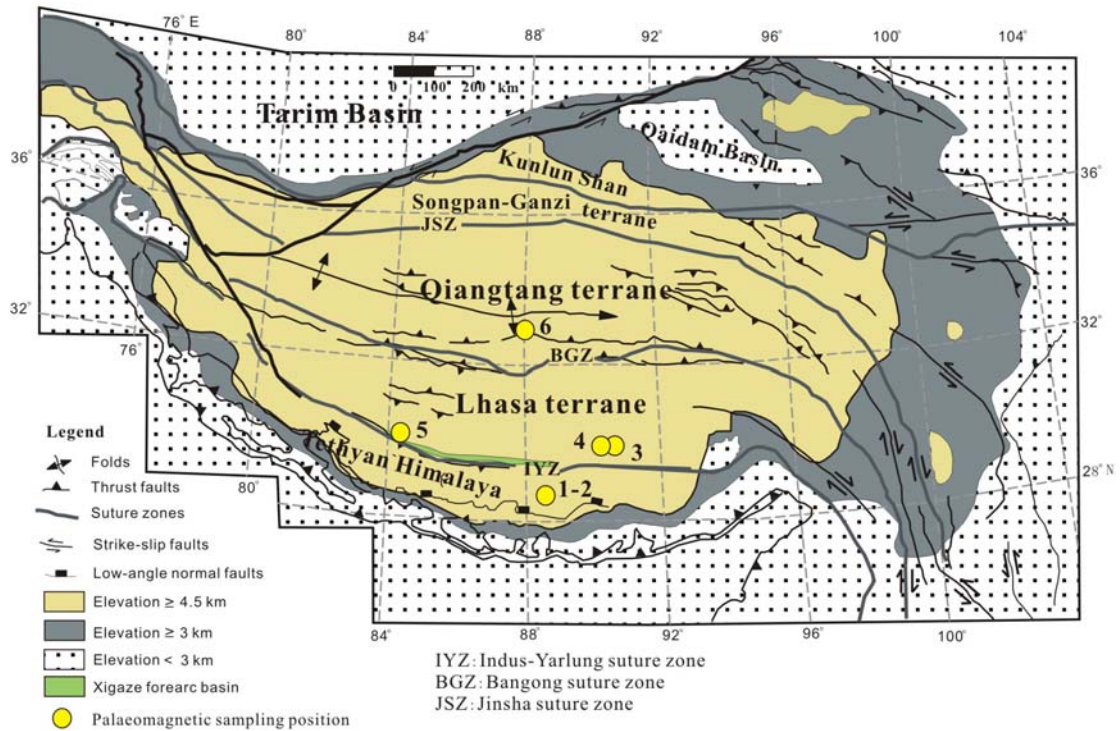

72

73 **Fig. S6** Tectonic and topographic map of the Tibetan-Himalaya to show  
 74 the sampling locations of palaeomagnetic studies we used for this study  
 75 (Modified after DeCelles *et al.* 2007<sup>9</sup>). Numbers 1-6 correspond to  
 76 palaeomagnetic studies as follows: 1, Patzelt *et al.* (1996)<sup>3</sup>; 2, Yi *et al.*  
 77 (2011)<sup>4</sup>; 3, Tan *et al.* (2010)<sup>5</sup>; 4, Sun *et al.* (2012)<sup>6</sup> and van Hinsbergen *et*  
 78 *al.* (2012)<sup>7</sup>; 5, This study; 6 Lippert *et al.* (2011)<sup>10</sup>.

79

80

81

82

83

84 **Supplementary Tables**

85 **Table S1:** Sample characteristic remanent directions (ChRMs) for the  
 86 upper Cuojiangding Group

| Site ID                | Strike | Dip | Direction<br>fit code | Demagnetization<br>steps | N  | Dg    | Ig    | Ds    | Is    | $\alpha_{95s}$ | Grade | Used<br>or<br>not |
|------------------------|--------|-----|-----------------------|--------------------------|----|-------|-------|-------|-------|----------------|-------|-------------------|
| <b>Quxia Formation</b> |        |     |                       |                          |    |       |       |       |       |                |       |                   |
| mj001                  | 65     | 84  | Dir PCA               | T330-T450                | 4  | 139.2 | 64.3  | 147.9 | -18.7 | 13.7           | C     | no                |
| mj002                  | 65     | 84  | DirOPCA               | T330-T590                | 10 | 197.3 | 37.2  | 194   | -31.5 | 6.8            | A     | yes               |
| mj004                  | 65     | 84  | Dir PCA               | T330-T450                | 4  | 176.1 | 69    | 162.6 | -13.6 | 8.9            | B     | yes               |
| mj005                  | 65     | 84  | Dir PCA               | T360-T530                | 5  | 95.4  | 80.9  | 147.2 | -1.4  | 6.8            | B     | yes               |
| mj006                  | 65     | 84  | DirOPCA               | T360-T500                | 4  | 171   | 61.8  | 163   | -21.1 | 8.2            | B     | yes               |
| mj007a                 | 65     | 84  | Dir PCA               | T360-T450                | 3  | 221.4 | 30.6  | 210.5 | -16.9 | 13.1           | C     | no                |
| mj008a                 | 65     | 84  | Dir PCA               | T250-T450                | 6  | 77.5  | 72.4  | 137.8 | -2    | 9              | C     | no                |
| mj017                  | 90     | 65  | DirOPCA               | T450-T670                | 12 | 174.9 | 18.7  | 173.1 | -46   | 6.4            | A     | yes               |
| mj018                  | 90     | 65  | Dir PCA               | T330-T530                | 6  | 126.2 | 35.4  | 137.9 | -11.1 | 10.7           | B     | yes               |
| mj019B                 | 90     | 65  | DirOPCA               | T330-T580                | 9  | 145.7 | 29.1  | 146.6 | -26.7 | 15.2           | A     | yes               |
| mj020                  | 90     | 65  | DirOPCA               | T450-T580                | 6  | 200.7 | -13.4 | 243.2 | -67.3 | 7.3            | A     | yes               |



---

|         |    |    |         |           |    |       |      |       |       |      |   |     |
|---------|----|----|---------|-----------|----|-------|------|-------|-------|------|---|-----|
| mj021   | 90 | 65 | Dir PCA | T360-T590 | 9  | 186.9 | 47.4 | 184.9 | -17.3 | 7.6  | A | yes |
| mj023-1 | 90 | 65 | DirOPCA | T450-T580 | 6  | 164.3 | 22.3 | 160.9 | -40.3 | 14.2 | B | yes |
| mj023   | 90 | 65 | DirOPCA | M030-M070 | 5  | 177.7 | 18.2 | 176.9 | -46.7 | 4.1  | A | yes |
| mj025   | 90 | 65 | Dir PCA | T570-T590 | 3  | 156.1 | 39.6 | 160.4 | -21.6 | 2.2  | A | yes |
| mj026   | 90 | 65 | Dir PCA | T330-T450 | 4  | 181.1 | 26.9 | 181.2 | -38   | 18.9 | C | no  |
| mj036   | 90 | 65 | DirOPCA | T640-T690 | 4  | 145.2 | 31.6 | 147.8 | -24.3 | 4.1  | B | yes |
| mj038   | 90 | 65 | Dir PCA | T390-T590 | 8  | 149.3 | 6.5  | 132.4 | -46.6 | 7.3  | A | yes |
| mj039   | 90 | 65 | DirOPCA | T420-T590 | 15 | 147.5 | 12.4 | 136   | -40.9 | 9.3  | B | yes |
| mj040   | 90 | 65 | Dir PCA | T480-T530 | 4  | 171.1 | 2.7  | 161.5 | -61   | 12.8 | B | yes |
| mj041   | 90 | 65 | DirOPCA | T360-T590 | 9  | 174.9 | 36.6 | 175.4 | -28.2 | 7.1  | A | yes |
| mj042   | 90 | 65 | Dir PCA | T420-T480 | 3  | 201.6 | 22.2 | 205.8 | -38.3 | 12.2 | B | yes |

**Gyalaze Formation**

|       |    |    |         |           |    |       |      |       |       |      |   |     |
|-------|----|----|---------|-----------|----|-------|------|-------|-------|------|---|-----|
| mj043 | 90 | 65 | DirOPCA | T300-T600 | 20 | 152.3 | 4.3  | 133.6 | -50.2 | 5.3  | A | yes |
| mj044 | 90 | 65 | DirOPCA | T390-T580 | 15 | 191   | 32.9 | 190.8 | -31.2 | 12.7 | A | yes |
| mj045 | 90 | 65 | DirOPCA | T480-T590 | 13 | 194.1 | -8.8 | 222.1 | -68.9 | 7.3  | A | yes |
| mj046 | 90 | 65 | DirOPCA | T420-T600 | 16 | 166.5 | -2.2 | 148   | -63.8 | 9.4  | A | yes |

---

---

|         |    |    |         |           |    |       |       |       |       |      |   |     |
|---------|----|----|---------|-----------|----|-------|-------|-------|-------|------|---|-----|
| mj047   | 90 | 65 | Dir PCA | T330-T450 | 5  | 179.7 | 51.8  | 179.8 | -13.2 | 7.7  | B | yes |
| mj048   | 90 | 65 | DirOPCA | T570-T600 | 5  | 129.5 | 25.5  | 132.3 | -19.8 | 13.9 | C | no  |
| mj049   | 90 | 65 | DirOPCA | T530-T570 | 7  | 190.9 | 33.8  | 190.5 | -30.3 | 8.9  | A | yes |
| mj050   | 90 | 65 | DirOPCA | T250-T640 | 15 | 2.4   | 10.5  | 9.3   | 75.3  | 11.8 | C | no  |
| mj051   | 90 | 65 | DirOPCA | T300-T550 | 12 | 183.3 | -25.5 | 280.7 | -87   | 6.2  | B | yes |
| mj052   | 90 | 65 | Dir PCA | T540-T560 | 3  | 60.7  | -26.4 | 53    | 12.1  | 1.6  | C | no  |
| mj053   | 90 | 65 | Dir PCA | T520-T575 | 9  | 147.1 | 10.1  | 133.6 | -42.5 | 7.2  | B | yes |
| mj054   | 90 | 65 | DirOPCA | T300-T565 | 15 | 150.4 | 33.4  | 152.9 | -25.1 | 9.6  | A | yes |
| mj055-1 | 94 | 74 | DirOPCA | M020-M060 | 5  | 179.3 | 36.5  | 179.3 | -37.3 | 2.9  | A | yes |
| mj055   | 94 | 74 | DirOPCA | T500-T570 | 4  | 173.6 | 4.4   | 156.3 | -67.1 | 11.4 | A | yes |
| mj056   | 94 | 74 | DirOPCA | T480-T580 | 10 | 171   | 4.1   | 150.4 | -66.1 | 6.9  | A | yes |
| mj057   | 94 | 74 | DirOPCA | T480-T565 | 9  | 203.6 | 49.4  | 197.7 | -22.3 | 2.6  | A | yes |
| mj058   | 94 | 74 | Dir PCA | T510-T530 | 3  | 197   | 8.2   | 212.9 | -62.6 | 14.3 | B | yes |
| mj059   | 94 | 74 | Dir PCA | T450-T590 | 7  | 121.7 | 43    | 143.2 | -7.9  | 9.5  | B | yes |
| mj060   | 94 | 74 | Dir PCA | T480-T530 | 4  | 144   | 54.8  | 161.8 | -11.5 | 14.1 | C | no  |
| mj061   | 94 | 74 | DirOPCA | T420-T565 | 11 | 229.6 | 17.9  | 238.9 | -33.7 | 7.2  | B | yes |

---

---

|       |    |    |         |           |    |       |       |       |       |      |   |     |
|-------|----|----|---------|-----------|----|-------|-------|-------|-------|------|---|-----|
| mj063 | 94 | 74 | DirOPCA | T510-T570 | 10 | 163.6 | 60.5  | 173.9 | -11.8 | 9.2  | B | yes |
| mj065 | 94 | 74 | DirOPCA | T520-T580 | 10 | 137.1 | 55.9  | 159.6 | -8.1  | 6.3  | A | yes |
| mj066 | 94 | 74 | Dir PCA | T330-T480 | 6  | 148   | 47.7  | 159.3 | -18.6 | 7.7  | A | yes |
| mj067 | 92 | 74 | Dir PCA | T250-T390 | 5  | 241.3 | 15.7  | 246.4 | -23.4 | 11.8 | C | no  |
| mj068 | 92 | 74 | DirOPCA | T510-T590 | 9  | 357   | -7.9  | 349.8 | 65.6  | 1.6  | A | no  |
| mj070 | 92 | 74 | GCnPCA  | T080-T250 | 5  | 109.1 | 11.6  | 288.2 | 12.8  | 4.9  | C | no  |
| mj073 | 92 | 74 | GCnPCA  | T390-T450 | 3  | 235.3 | 72.4  | 196.1 | 5.1   | 2.3  | C | no  |
| mj075 | 92 | 74 | DirOPCA | T450-T570 | 5  | 345.1 | -28.9 | 341.9 | 42.2  | 11.5 | B | no  |
| mj077 | 92 | 74 | DirOPCA | T330-T420 | 4  | 193.5 | 46.7  | 190.8 | -26.4 | 14   | C | no  |
| mj078 | 92 | 74 | DirOPCA | T250-T570 | 10 | 143   | 9.7   | 123   | -43.6 | 10.4 | B | yes |
| mj079 | 93 | 74 | DirOPCA | T450-T590 | 11 | 204.5 | 29.5  | 207.6 | -40   | 4.8  | A | yes |
| mj080 | 93 | 74 | DirOPCA | T330-T390 | 3  | 208.4 | 23    | 216.1 | -43.7 | 10.4 | B | yes |
| mj081 | 93 | 72 | GCnPCA  | T150-T300 | 4  | 101.8 | 18.2  | 293   | 2.4   | 3.9  | C | no  |
| mj082 | 93 | 72 | GCnPCA  | T200-T300 | 3  | 106.8 | 3.6   | 280.8 | 11.9  | 12.6 | C | no  |
| mj083 | 93 | 72 | DirOPCA | T480-T570 | 8  | 191   | 9.4   | 199.8 | -61.5 | 6.1  | A | yes |
| mj084 | 93 | 72 | DirOPCA | T360-T575 | 14 | 157.9 | 2.8   | 130.6 | -57.7 | 14.1 | B | yes |

---

---

|       |    |    |         |           |    |       |      |       |       |      |   |     |
|-------|----|----|---------|-----------|----|-------|------|-------|-------|------|---|-----|
| mj086 | 93 | 72 | DirOPCA | T330-T535 | 10 | 107.3 | 60   | 153.6 | -8.6  | 13.8 | C | no  |
| mj087 | 93 | 72 | GChPCA  | T120-T250 | 4  | 113.9 | 13.2 | 292.6 | 15.1  | 11   | C | no  |
| mj088 | 93 | 72 | DirOPCA | T390-T600 | 14 | 205.2 | 16.6 | 216.6 | -49.1 | 14.4 | B | yes |
| mj089 | 93 | 72 | Dir PCA | T480-T570 | 8  | 220.8 | 9.2  | 240.1 | -43.8 | 8.8  | B | yes |
| mj090 | 93 | 72 | GChPCA  | T100-T360 | 7  | 135.9 | 36.3 | 324.1 | 19.8  | 3.1  | C | no  |
| mj091 | 93 | 72 | DirOPCA | T330-T530 | 9  | 326.2 | -3.6 | 300.1 | 47.8  | 5.8  | B | no  |
| mj097 | 93 | 72 | DirOPCA | T420-T510 | 4  | 115.4 | 32.3 | 130.9 | -8.1  | 5.5  | C | no  |
| mj098 | 93 | 72 | Dir PCA | T360-T450 | 4  | 151   | 12   | 134.3 | -46.4 | 11.7 | B | yes |
| mj099 | 93 | 72 | Dir PCA | T330-T420 | 4  | 178.9 | 65.2 | 181.3 | -6.8  | 10.4 | C | no  |
| mj100 | 93 | 72 | DirOPCA | T360-T450 | 4  | 174.8 | 40.8 | 175.8 | -30.7 | 10.7 | A | yes |
| mj102 | 93 | 72 | DirOPCA | T360-T450 | 4  | 162.1 | 21.4 | 154.7 | -45.6 | 11.4 | B | yes |
| mj103 | 93 | 72 | Dir PCA | T360-T420 | 3  | 158.8 | 58.2 | 170.3 | -11.2 | 12.2 | B | yes |
| mj105 | 93 | 72 | GChPCA  | T120-T250 | 4  | 150.7 | 48.5 | 341.2 | 17.5  | 1.2  | C | no  |
| mj106 | 93 | 72 | Dir PCA | T360-T420 | 3  | 168.3 | 67.8 | 177.5 | -3.5  | 21.5 | C | no  |
| mj107 | 93 | 72 | DirOPCA | T450-T550 | 6  | 181.4 | 14   | 180.1 | -58   | 13.9 | B | yes |
| mj108 | 93 | 72 | DirOPCA | T330-T510 | 7  | 153.4 | 40.3 | 158.3 | -25.6 | 8.6  | B | yes |

---

---

|       |     |    |         |           |    |       |       |       |       |      |   |     |
|-------|-----|----|---------|-----------|----|-------|-------|-------|-------|------|---|-----|
| mj109 | 93  | 72 | DirOPCA | T200-T300 | 3  | 150.1 | 49.8  | 161.6 | -16.2 | 8.8  | B | yes |
| mj110 | 93  | 72 | GcNPCA  | T200-T330 | 4  | 239   | 57.7  | 209.3 | 2.2   | 13   | C | no  |
| mj111 | 93  | 72 | DirOPCA | T360-T510 | 6  | 183.7 | 75.9  | 183.2 | -3.9  | 8.6  | B | yes |
| mj112 | 93  | 68 | GcNPCA  | T560-T580 | 4  | 119.8 | 48.8  | 147   | 0.4   | 6.9  | C | no  |
| mj113 | 93  | 68 | DirOPCA | T540-T590 | 7  | 4     | -53.9 | 3.6   | 14.1  | 9.3  | A | no  |
| mj114 | 93  | 68 | GcNPCA  | T120-T250 | 4  | 91.1  | 13.2  | 104.6 | 6.6   | 4.2  | C | no  |
| mj117 | 93  | 68 | DirOPCA | T560-T600 | 6  | 207.3 | 3.9   | 228.5 | -54.8 | 0.8  | A | yes |
| mj118 | 93  | 68 | DirOPCA | T250-T565 | 14 | 191.3 | -3.8  | 208   | -70.2 | 7.6  | B | yes |
| mj119 | 93  | 68 | Dir PCA | T300-T450 | 6  | 157.1 | -4.3  | 124.5 | -59.3 | 12.3 | B | yes |
| mj120 | 93  | 68 | GcNPCA  | T300-T360 | 3  | 174.8 | 74.5  | 180.8 | 6.6   | 7.4  | C | no  |
| mj122 | 93  | 68 | DirOPCA | T570-T590 | 3  | 106.5 | 29.3  | 125   | -0.3  | 1.7  | C | no  |
| mj125 | 93  | 68 | GcNPCA  | T200-T300 | 3  | 145   | 39.3  | 332.7 | 19.2  | 5.5  | C | no  |
| mj229 | 288 | 56 | DirOPCA | T390-T600 | 14 | 110.3 | -24.7 | 130   | -11.7 | 3.4  | A | yes |
| mj231 | 288 | 56 | DirOPCA | T450-T600 | 8  | 120.9 | -24.7 | 135.5 | -3.8  | 1.4  | A | yes |
| mj232 | 288 | 56 | DirOPCA | T420-T600 | 13 | 99.5  | -62.3 | 164.5 | -33.5 | 0.7  | A | yes |
| mj234 | 288 | 56 | DirOPCA | T550-T590 | 6  | 15.6  | 69.9  | 17.2  | 14    | 7.9  | B | no  |

---

---

|         |     |    |         |           |    |       |       |       |       |      |   |     |
|---------|-----|----|---------|-----------|----|-------|-------|-------|-------|------|---|-----|
| mj237   | 288 | 56 | DirOPCA | T420-T570 | 11 | 76.5  | -49   | 145.8 | -44.9 | 9.5  | A | yes |
| mj239   | 333 | 43 | DirOPCA | T360-T530 | 7  | 75.8  | -51.7 | 187.4 | -80.4 | 8.1  | B | yes |
| mj240   | 333 | 43 | DirOPCA | T360-T510 | 6  | 100.4 | -47   | 167   | -64.8 | 8.1  | B | yes |
| mj241   | 333 | 43 | GCnPCA  | T150-T420 | 8  | 261.3 | 15.6  | 274.8 | 55.1  | 13.4 | C | no  |
| mj242   | 333 | 43 | GCnPCA  | T80-T330  | 7  | 123.9 | 31.2  | 111.7 | 5.4   | 14.3 | C | no  |
| mj243-1 | 333 | 43 | GCnPCA  | T150-T360 | 6  | 48.7  | 6.2   | 225.5 | 35.3  | 15.3 | C | no  |
| mj243   | 333 | 43 | DirOPCA | M20-M70   | 6  | 298.6 | 30    | 331.7 | 44.4  | 13.8 | B | no  |
| mj244   | 333 | 43 | GCnPCA  | T150-T360 | 6  | 250.1 | 15    | 255.8 | 57.5  | 6.7  | C | no  |
| mj245b  | 333 | 43 | DirOPCA | M020-M090 | 8  | 346.4 | 51.8  | 19.8  | 28.5  | 4.6  | B | no  |
| mj246   | 333 | 43 | DirOPCA | T330-T480 | 6  | 113.9 | -29.2 | 147.2 | -47.1 | 7.9  | B | yes |
| mj247-1 | 333 | 43 | GCnPCA  | T150-T330 | 5  | 68.6  | 10.2  | 249.5 | 32.6  | 6.4  | C | no  |
| mj247   | 333 | 43 | DirOPCA | M20-M90   | 8  | 333.6 | 36.9  | 0.5   | 25.7  | 5.3  | C | no  |

---

87 Note: DirOPCA: best-fitting demagnetization trajectory (forced to the origin); DirPCA:  
88 best-fitting demagnetization trajectory; GCnPCA: great-circle fit; N: number of demagnetization  
89 steps used to define the ChRM;  $D_g$ ,  $I_g$ : Declination and Inclination in geographic coordinates  
90 (before tilt correction);  $D_s$ ,  $I_s$ : Declination and Inclination in stratigraphic coordinates (after tilt  
91 correction);  $\alpha_{95_s}$ : 95% limits confidence in stratigraphic coordinates; Grades *A*, *B* and *C* to the  
92 Zijdeveld diagram best-fits: *A* for very good to excellent, *B* for OK and seems right but doubtful  
93 and *C* for doubtful.

94

95 **Table S2:** Fold test results on ChRM with the summation of cosine  
 96 (SCOS) value for the structural correction using definition 2 of SCOS

| The upper Cuojiangding Group (84.3°E, 29.9°N) N = 69 sites |             |
|------------------------------------------------------------|-------------|
|                                                            | SCOS values |
| In Situ                                                    | 22.043      |
| Unfolded                                                   | 0.178       |
| *95%                                                       | 9.662       |
| **99%                                                      | 13.662      |

97 \*(\*\*): 95%(99%) critical values which must be exceeded for significant correlation.

98

99

100

101

102

103

104

105

106

107 **Table S3:** Summary of the Late Cretaceous-Eocene palaeomagnetic  
 108 results from northern India

| Location<br>(°N/°E) | Lithology                     | Age         | n  | D <sub>s</sub> (°) | I <sub>s</sub> (°) | $\alpha_{95s}$<br>(°) | Palaeolat.    | VGP<br>Lat.(°) | VGP<br>Long.(°) | Field<br>test | Reference                                       |
|---------------------|-------------------------------|-------------|----|--------------------|--------------------|-----------------------|---------------|----------------|-----------------|---------------|-------------------------------------------------|
| 29/87               | Zongpu Fm.<br>sediments       | 57 Ma       | 4  | 154.0              | -5.1               | 8.4                   | -2.5±5.3      | 49.8           | 309.7           | F+            | Besse<br><i>et al.</i><br>(1984) <sup>11</sup>  |
| 28.7/86.8           | Zongpu Fm.<br>sediments       | 62-66<br>Ma | 3  | 162.4              | -29.1              | 6.6                   | -15.6±<br>4.0 | 69.1           | 312.6           | —             | Tong<br><i>et al.</i><br>(2008) <sup>12</sup>   |
| 28.3/88.5           | Zhongshan<br>Fm.<br>sediments | 65-71<br>Ma | 14 | 4.0                | -11.2              | 8.5                   | -4.7±4.4      | 55.8           | 261.4           | F+            | Patzelt<br><i>et al.</i><br>(1996) <sup>3</sup> |
| 28.3/88.5           | Jidula Fm.<br>sediments       | 63-66<br>Ma | 4  | 178.6              | -14.4              | 7.3                   | 8.3±5.7       | 69.0           | 272.4           | F+            | Patzelt<br><i>et al.</i><br>(1996) <sup>3</sup> |
| 28.3/88.5           | Zongpu Fm.<br>sediments       | 59-63<br>Ma | 14 | 176.2              | -7.9               | 7.5                   | 5.0±5.9       | 65.4           | 277.6           | F+            | Patzelt<br><i>et al.</i><br>(1996) <sup>3</sup> |
| 28.3/88.5           | Zongpu Fm.<br>sediments       | 59-62<br>Ma | 18 | 180.8              | -11.1              | 4.2                   | 6.6±3.5       | 67.3           | 266.3           | F+,<br>R+     | Yi <i>et al.</i><br>(2011) <sup>4</sup>         |
| 28.3/88.5           | Zongpu Fm.<br>sediments       | 56-59<br>Ma | 14 | 177.0              | -19.6              | 3.5                   | 11.1±2.5      | 71.6           | 277.8           | F+,<br>R+     | Yi <i>et al.</i><br>(2011) <sup>4</sup>         |

109 Note: n, number of sites; D<sub>s</sub>, declination (stratigraphic coordinate); I<sub>s</sub>, inclination (stratigraphic  
 110 coordinate);  $\alpha_{95}$ , 95% confidence limit (for stratigraphic data); Palaeolat., palaeolatitude for a  
 111 reference position; VGP, virtual geomagnetic pole; lat., latitude; long., longitude; Field test, F+,  
 112 positive fold test, R+, positive reverse test, — no information; Fm., Formation;

113



114 **Table S4:** Summary of the Late Cretaceous-Eocene palaeomagnetic  
 115 results from southern Tibet

| Location<br>(°N/°E)  | Lithology                                | Age            | n  | D <sub>s</sub> (°) | I <sub>s</sub> (°) | $\alpha_{95s}$ (°) | Palaeo-<br>lat. | VGP<br>Lat.(°) | VGP<br>Long.(°) | Field<br>test | Reference                                                   |
|----------------------|------------------------------------------|----------------|----|--------------------|--------------------|--------------------|-----------------|----------------|-----------------|---------------|-------------------------------------------------------------|
| Late Cretaceous Data |                                          |                |    |                    |                    |                    |                 |                |                 |               |                                                             |
| 29.4/91.09           | Takena Fm.<br>sediments                  | K <sub>2</sub> | 7  | 338.0              | 36.0               | 10.0               | 20.0±<br>7.8    | 68.0           | 340.0           | F+            | Pozzi and<br>Westphal<br>(1982) <sup>13</sup>               |
| 32.0/91.5<br>North   | Takena Fm.<br>sediments                  | 100-125<br>Ma  | 6  | 338.7              | 25.4               | 8.9                | 13.3±<br>5.0    | 63.5           | 325.4           | F+            | Achache<br><i>et al.</i><br>(1984) <sup>14</sup>            |
| 29.9/91.0<br>South   | Takena Fm.<br>sediments                  | 100-125<br>Ma  | 8  | 354.3              | 22.6               | 8.3                | 11.8±<br>6.2    | 71.2           | 288.4           | F+            | Achache<br><i>et al.</i><br>(1984) <sup>14</sup>            |
| 29.9/91.2            | Takena Fm.<br>sediments                  | K <sub>2</sub> | 8  | 357.0              | 15.0               | 6.7                | 7.6±<br>3.5     | 68.0           | 279.0           | F+            | Lin and<br>Watts<br>(1988) <sup>15</sup>                    |
| 29.9/91.2            | Shexing Fm.<br>sediments                 | 65-110<br>Ma   | 43 | 350.2              | 42.0               | 2.5                | 24.2±<br>1.4    | 79.6           | 329.9           | F+            | Tan <i>et al.</i><br>(2010) <sup>5</sup>                    |
| 29.9/91.2            | Shexing Fm.<br>Intercalated<br>Volcanics | 85-110<br>Ma   | 21 | 22.6               | 41.9               | 4.4                | 24.2±<br>3.3    | 69.1           | 191.7           | F+            | Tan <i>et al.</i><br>(2010) <sup>5</sup>                    |
| 29.9/90.7            | Shexing Fm.<br>sediments                 | 72-110<br>Ma   | 17 | 344.1              | 34.5               | 5.2                | 19.0±<br>5.3    | 71.9           | 327.2           | F+            | Sun <i>et al.</i><br>(2012) <sup>6</sup>                    |
| 29.9/90.7            | Shexing Fm.<br>sediments                 | 72-110<br>Ma   | 15 | 343.4              | 41.6               | 2.8                | 23.8±<br>2.3    | 74.1           | 342.7           | F+            | van<br>Hinsberg-<br>en <i>et al.</i><br>(2012) <sup>7</sup> |
| Palaeogene Data      |                                          |                |    |                    |                    |                    |                 |                |                 |               |                                                             |
| 29.9/90.0            | Linzizong Gp.<br>Volcanics               | 48.5 Ma        | 2  | 0.0                | 18.0               | —                  | 8.3             | 69.3           | 271.0           | —             | Westphal<br>and Pozzi<br>(1983) <sup>16</sup>               |

|                                     |                                        |          |    |       |       |      |              |      |       |           |                                                             |
|-------------------------------------|----------------------------------------|----------|----|-------|-------|------|--------------|------|-------|-----------|-------------------------------------------------------------|
| 29.9/90.0                           | Linzizong Gp.<br>Volcanics             | 45-60 Ma | 8  | 170.9 | -25.5 | 11.0 | 13.5±<br>6.5 | 71.5 | 300.0 | —         | Achache<br><i>et al.</i><br>(1984) <sup>14</sup>            |
| 29.9/91.2<br>29.8/89.2              | Linzizong Gp.<br>Volcanics+Sediments   | 60-64 Ma | 15 | 173.5 | -14.8 | 8.8  | 6.6±<br>8.5  | 66   | 284.9 | F+        | Chen<br><i>et al.</i><br>(2010) <sup>17</sup>               |
| 30.0/91.2<br>29.8/89.2              | Linzizong Gp.<br>Volcanics+Sediments   | 44-60 Ma | 23 | 355.9 | 20.0  | 6.9  | 10.8±<br>5.3 | 70.6 | 281.0 | F+        | Chen<br><i>et al.</i><br>(2010) <sup>17</sup>               |
| 30.0/91.1                           | Linzizong Gp.<br>Volcanics             | 47-54 Ma | 24 | 12.5  | 39.4  | 5.6  | 22.3±<br>5.0 | 76.9 | 205.8 | —         | Dupont-<br>Nivet<br><i>et al.</i><br>(2010) <sup>18</sup>   |
| 29.9/90.0<br>30.0/91.1<br>29.9/91.2 | Linzizong Gp.<br>Volcanics             | 40-60 Ma | 37 | 7.7   | 40.3  | 5.6  | 23.0±<br>4.2 | 80.8 | 217.3 | F+        | Dupont-<br>Nivet<br><i>et al.</i><br>(2010) <sup>*18</sup>  |
| 29.9/91.1                           | Linzizong Gp.<br>Dykes Volcanics       | 53 Ma    | 10 | 15.4  | 27.2  | 9.7  | 14.4±<br>5.8 | 68.9 | 225.4 | F+,<br>R+ | Liebke<br><i>et al.</i><br>(2010) <sup>19</sup>             |
| 30.1/90.9                           | Linzizong Gp.<br>Volcanics             | 55 Ma    | 14 | 359.0 | 21.6  | 9.2  | 13.6±<br>5.4 | 73.6 | 274.3 | F+        | Sun <i>et al.</i><br>(2010) <sup>20</sup>                   |
| 29.9/91.2                           | Linzizong Gp.<br>Volcanics             | 40-43 Ma | 10 | 359.5 | 51.8  | 5.6  | 32.4±<br>4.8 | 86.3 | 91.2  | F+        | Tan <i>et al.</i><br>(2010) <sup>5</sup>                    |
| —                                   | Linzizong Gp.<br>Volcanics             | 47-56 Ma | 52 | 3.5   | 35.5  | 3.6  | 19.6±<br>3.9 | 80.1 | 248.6 | F+,<br>R+ | van<br>Hinsberg-<br>en <i>et al.</i><br>(2012) <sup>7</sup> |
| 29.9/84.3                           | Upper<br>Cuojiangding Gp.<br>Sediments | 54-57 Ma | 62 | 168.1 | -42.0 | 7.1  | 24.2±<br>5.9 | 78.0 | 329.0 | F+        | This<br>study                                               |
| 33/88                               | Volcanics                              | 32-38 Ma | 20 | —     | —     | —    | 28.7         | —    | —     | —         | Lippert<br><i>et al.</i><br>(2011) <sup>10</sup>            |

116 Note: n, number of sites; D<sub>s</sub>, declination (stratigraphic coordinate); I<sub>s</sub>, inclination (stratigraphic  
117 coordinate);  $\alpha_{95}$ , 95% confidence limit (for stratigraphic data); Palaeolat., palaeolatitude for a  
118 reference position; VGP, virtual geomagnetic pole; lat., latitude; long., longitude; Field test, F+,  
119 positive fold test, R+, positive reverse test, — no information; Fm., Formation; Gp., Group;  
120 Dupont-Nivet *et al.* (2010)\*, combined data from Achache *et al.* (1984)<sup>14</sup>, Dupont-Nivet *et al.*  
121 (2010)<sup>18</sup> and Tan *et al.* (2010)<sup>5</sup>.

122

123

124

125

126

127

128

129

130

131

132

133

134 **Table S5:** Palaeomagnetic poles and palaeolatitudes for the margin of  
 135 Asia and India used in Figure 6a

| Numbers<br>In Figure 6                                             | Location                      |           | Age       | Pole             | Pole              | Palaeolatitude (°)                        | Reference                                           |
|--------------------------------------------------------------------|-------------------------------|-----------|-----------|------------------|-------------------|-------------------------------------------|-----------------------------------------------------|
|                                                                    | Locality                      | °N/°E     |           | Latitude<br>(°N) | Longitude<br>(°E) | At Reference Position<br>(29.9°N, 84.3°E) |                                                     |
| Sothern Asian Margin                                               |                               |           |           |                  |                   |                                           |                                                     |
| 1                                                                  | Xigaze forearc basin          | 29.9/84.3 | 54-57 Ma  | 78.0             | 329.0             | 24.2±5.9                                  | This study                                          |
| 2                                                                  | Southern Qiangtang<br>terrane | 33/88     | 32-38 Ma  | --               | --                | 25.6±3.8                                  | van Hinsbergen<br><i>et al.</i> (2012) <sup>7</sup> |
| 3                                                                  | Southern Lhasa<br>terrane     | 29.9/91.2 | 65-110 Ma | 79.6             | 329.9             | 25.2±1.4                                  | Tan <i>et al.</i><br>(2010) <sup>5</sup>            |
| 4                                                                  | Southern Lhasa<br>terrane     | 29.9/90.7 | 72-110 Ma | 74.1             | 342.7             | 25.6±2.3                                  | van Hinsbergen<br><i>et al.</i> (2012) <sup>7</sup> |
| 5                                                                  | Southern Lhasa<br>terrane     | 29.9/91.2 | 85-110 Ma | 69.1             | 191.7             | 21.9±3.3                                  | Tan <i>et al.</i><br>(2010) <sup>5</sup>            |
| Northern Indian Margin                                             |                               |           |           |                  |                   |                                           |                                                     |
| 6                                                                  | Tethyan Himalaya              | 28.3/88.5 | 65-71 Ma  | 55.8             | 261.4             | -4.3±4.4                                  | Patzelt <i>et al.</i><br>(1996) <sup>3</sup>        |
| 7                                                                  | Tethyan Himalaya              | 28.3/88.5 | 59-62 Ma  | 67.3             | 266.3             | 7.2±3.5                                   | Yi <i>et al.</i> (2011) <sup>4</sup>                |
| 8                                                                  | Tethyan Himalaya              | 28.3/88.5 | 56-59 Ma  | 71.6             | 277.8             | 11.9±2.5                                  | Yi <i>et al.</i> (2011) <sup>4</sup>                |
| Southern Margin of Eurasian from Apparent Polar Wander Path (APWP) |                               |           |           |                  |                   |                                           |                                                     |
| 9                                                                  | Eurasian APWP                 | --        | 0 Ma      | 88.5             | 173.9             | 29.9±1.9                                  | Torsvik <i>et al.</i><br>(2012) <sup>21</sup>       |
| 9                                                                  | Eurasian APWP                 | --        | 10 Ma     | 86.7             | 150               | 31.2±1.8                                  | Torsvik <i>et al.</i><br>(2012) <sup>21</sup>       |
| 9                                                                  | Eurasian APWP                 | --        | 20 Ma     | 84.4             | 152.1             | 31.9±2.6                                  | Torsvik <i>et al.</i><br>(2012) <sup>21</sup>       |
| 9                                                                  | Eurasian APWP                 | --        | 30 Ma     | 83.1             | 146.5             | 32.9±2.6                                  | Torsvik <i>et al.</i><br>(2012) <sup>21</sup>       |
| 9                                                                  | Eurasian APWP                 | --        | 40 Ma     | 81.1             | 144.3             | 33.7±2.9                                  | Torsvik <i>et al.</i><br>(2012) <sup>21</sup>       |

|                                    |               |    |        |      |       |           |                                               |
|------------------------------------|---------------|----|--------|------|-------|-----------|-----------------------------------------------|
| 9                                  | Eurasian APWP | -- | 50 Ma  | 78.9 | 164.7 | 31.1±2.8  | Torsvik <i>et al.</i><br>(2012) <sup>21</sup> |
| 9                                  | Eurasian APWP | -- | 60 Ma  | 78.2 | 172.6 | 29.6±2.1  | Torsvik <i>et al.</i><br>(2012) <sup>21</sup> |
| 9                                  | Eurasian APWP | -- | 70 Ma  | 79.2 | 175.7 | 29.1±2.5  | Torsvik <i>et al.</i><br>(2012) <sup>21</sup> |
| 9                                  | Eurasian APWP | -- | 80 Ma  | 79.7 | 177.9 | 28.7±2.9  | Torsvik <i>et al.</i><br>(2012) <sup>21</sup> |
| 9                                  | Eurasian APWP | -- | 90 Ma  | 80.4 | 167.2 | 30.6±2.5  | Torsvik <i>et al.</i><br>(2012) <sup>21</sup> |
| 9                                  | Eurasian APWP | -- | 100 Ma | 80.8 | 152.3 | 33.0±3.3  | Torsvik <i>et al.</i><br>(2012) <sup>21</sup> |
| 9                                  | Eurasian APWP | -- | 110 Ma | 81.2 | 193.1 | 26.7±3.3  | Torsvik <i>et al.</i><br>(2012) <sup>21</sup> |
| Northern Margin of India from APWP |               |    |        |      |       |           |                                               |
| 10                                 | Indian APWP   | -- | 0 Ma   | 88.5 | 173.9 | 29.9±1.9  | Torsvik <i>et al.</i><br>(2012) <sup>21</sup> |
| 10                                 | Indian APWP   | -- | 10 Ma  | 87.2 | 240.4 | 27.3±1.8  | Torsvik <i>et al.</i><br>(2012) <sup>21</sup> |
| 10                                 | Indian APWP   | -- | 20 Ma  | 83.7 | 254.7 | 23.7±2.6  | Torsvik <i>et al.</i><br>(2012) <sup>21</sup> |
| 10                                 | Indian APWP   | -- | 30 Ma  | 79.7 | 281.7 | 20.0±2.6  | Torsvik <i>et al.</i><br>(2012) <sup>21</sup> |
| 10                                 | Indian APWP   | -- | 40 Ma  | 74.7 | 286.8 | 15.6±2.9  | Torsvik <i>et al.</i><br>(2012) <sup>21</sup> |
| 10                                 | Indian APWP   | -- | 50 Ma  | 65.1 | 278.4 | 5.6±2.8   | Torsvik <i>et al.</i><br>(2012) <sup>21</sup> |
| 10                                 | Indian APWP   | -- | 60 Ma  | 48.5 | 280.8 | -10.2±2.1 | Torsvik <i>et al.</i><br>(2012) <sup>21</sup> |
| 10                                 | Indian APWP   | -- | 70 Ma  | 36.4 | 280.7 | -21.9±2.5 | Torsvik <i>et al.</i><br>(2012) <sup>21</sup> |

136

137

138

139

140 **References for Supplementary Materials:**

- 141 S1 Day, R., Fuller, M. & Schmidt, V. Hysteresis properties of  
142 titanomagnetites: grain-size and compositional dependence. *Phys.*  
143 *Earth Planet In.* **13**, 260-267 (1977).
- 144 S2 Dunlop, D. J. Theory and application of the Day plot (Mrs/Ms  
145 versus Hcr/Hc) 1. Theoretical curves and tests using  
146 titanomagnetite data. *J. geophys. Res.* **107**, B32056 (2002).
- 147 S3 Patzelt, A., Li, H. M., Wang, J. D. & Appel, E. Palaeomagnetism  
148 of Cretaceous to Tertiary sediments from southern Tibet: Evidence  
149 for the extent of the northern margin of India prior to the collision  
150 with Eurasia. *Tectonophysics* **259**, 259-284 (1996).
- 151 S4 Yi, Z., Huang, B., Chen, J., Chen, L. & Wang, H. Palaeomagnetism  
152 of early Palaeogene marine sediments in southern Tibet, China:  
153 Implications to onset of the India-Asia collision and size of Greater  
154 India. *Earth Planet Sci. Lett.* **309**, 153-165 (2011).
- 155 S5 Tan, X. D. *et al.* New palaeomagnetic results from the Lhasa block:  
156 Revised estimation of latitudinal shortening across Tibet and  
157 implications for dating the India-Asia collision. *Earth Planet Sci.*  
158 *Lett.* **293**, 396-404 (2010).
- 159 S6 Sun, Z. *et al.* Palaeomagnetism of late Cretaceous sediments from  
160 southern Tibet: Evidence for the consistent palaeolatitudes of the

- 161 southern margin of Eurasia prior to the collision with India.  
162 *Gondwana Res.* **21**, 53-63 (2012).
- 163 S7 van Hinsbergen, D. J. J. *et al.* Greater India Basin hypothesis and a  
164 two-stage Cenozoic collision between India and Asia. *Proc. Natl*  
165 *Acad. Sci. USA* **109**, 7659-7664 (2012).
- 166 S8 Coe, R. S., Globerman, B. R., Plumley, P. W. & Thrupp, G.A.  
167 Palaeomagnetic results from Alaska and their tectonic implications.  
168 in *Tectonostratigraphic terranes of the Circum-Pacific region:*  
169 *American Association of Petroleum Geologists* (ed D.G.  
170 Howell) 85-108 (Circum-Pacific Council on Energy and  
171 Resources Earth Sciences Series, 1985).
- 172 S9 DeCelles, P. G., Kapp, P., Ding, L. & Gehrels, G. E. Late  
173 Cretaceous to middle Tertiary basin evolution in the central  
174 Tibetan Plateau: Changing environments in response to tectonic  
175 partitioning, aridification, and regional elevation gain. *Geol. Soc.*  
176 *Am. Bull.* **119**, 654-680 (2007).
- 177 S10 Lippert, P. C., Zhao, X., Coe, R. S. & Lo, C. H. Palaeomagnetism  
178 and  $^{40}\text{Ar}/^{39}\text{Ar}$  geochronology of upper Palaeogene volcanic rocks  
179 from Central Tibet: implications for the Central Asia inclination  
180 anomaly, the palaeolatitude of Tibet and post-50 Ma shortening  
181 within Asia. *Geophys J. Int.* **184**, 131-161 (2011).

- 182 S11 Besse, J., Courtillot, V., Pozzi, J., Westphal, M. & Zhou, Y.  
183 Palaeomagnetic estimates of crustal shortening in the Himalayan  
184 thrusts and Zangbo suture. *Nature* **311**, 621–626 (1984).
- 185 S12 Tong, Y. *et al.* Early Paleocene paleomagnetic results from  
186 southern Tibet, and tectonic implications. *Int. Geol. Rev.* **50**,  
187 546-562 (2008).
- 188 S13 Pozzi, J. P., Westphal, M., Zhou, Y. X., Xing, L. S. & Chen, X. Y.  
189 Position of the Lhasa block, South Tibet, during the late Cretaceous.  
190 *Nature* **297**, 319-321 (1982).
- 191 S14 Achache, J., Courtillot, V. & Xiu, Z. Y. Palaeogeographic and  
192 tectonic evolution of southern Tibet since middle Cretaceous time:  
193 New palaeomagnetic data and synthesis. *J. Geophys. Res.* **89**,  
194 10311-10339 (1984)
- 195 S15 Lin, J. L. & Watts, D. R. Palaeomagnetic results from the Tibetan  
196 Plateau. *Phil. Trans. R. Soc. A, Mathematical and Physical*  
197 *Sciences* **327**, 239-262 (1988).
- 198 S16 Westphal, M., Pozzi, J. P., Zhou, Y. X., Xing, L. S. & Chen, X. Y.  
199 Palaeomagnetic data about southern Tibet (Xizang)—The  
200 Cretaceous formations of the Lhasa block. *Geophysical Journal of*  
201 *the Royal Astronomical Society* **73**, 507-521 (1983).
- 202 S17 Chen, J. S., Huang, B. C. & Sun, L. S. New constraints to the onset  
203 of the India-Asia collision: Paleomagnetic reconnaissance on the



- 204 Linzizong Group in the Lhasa Block, China. *Tectonophysics* **489**,  
205 189-209 (2010).
- 206 S18 Dupont-Nivet, G., Lippert, P. C., van Hinsbergen, D. J. J., Meijers,  
207 M. J. M. & Kapp, P. Palaeolatitude and age of the Indo-Asia  
208 collision: palaeomagnetic constraints. *Geophys J. Int.* **182**,  
209 1189-1198 (2010).
- 210 S19 Liebke, U. *et al.* Position of the Lhasa terrane prior to India-Asia  
211 collision derived from palaeomagnetic inclinations of 53 Ma old  
212 dykes of the Linzhou Basin: constraints on the age of collision and  
213 post-collisional shortening within the Tibetan Plateau. *Geophys J.*  
214 *Int.* **182**, 1199-1215 (2010).
- 215 S20 Sun, Z. M., Jiang, W., Li, H. B., Pei, J. L. & Zhu, Z. M. New  
216 paleomagnetic results of Paleocene volcanic rocks from the Lhasa  
217 block: Tectonic implications for the collision of India and Asia.  
218 *Tectonophysics* **490**, 257-266 (2010).
- 219 S21 Torsvik, T. H. *et al.* Phanerozoic polar wander, palaeogeography  
220 and dynamics. *Earth-Sci. Rev.* **114**, 325–368 (2012).  
221  
222
